# Supplementary material for: Daylight Saving Time and Acute Myocardial Infarction: A Meta-Analysis
Source: J Clin Med. 2019 Mar 23;8(3):404. doi: 10.3390/jcm8030404 (PMC6463000; doi:10.3390/jcm8030404)
Supplement: Supplementary file 1 [file jcm-08-00404-s001.pdf]

## Daylight saving time and acute myocardial infarction: a meta-analysis.

### Supplementary material

**Table S1.** List of the excluded studies, and reasons for the exclusion.

| First author - Year              | Reason for the exclusion                                                                                   |
|----------------------------------|------------------------------------------------------------------------------------------------------------|
| Foerch 2008 <sup>[1]</sup>       | Only data on pre-post- DST stroke incidence reported                                                       |
| Sipilä 2016 <sup>[2]</sup>       | Only data on pre-post- DST stroke incidence reported                                                       |
| Lindenberger 2018 <sup>[3]</sup> | Only data on forensic autopsies in the week following DST reported (absence of pre- post- DST comparisons) |
| Manfredini 2018 <sup>[4]</sup>   | No additional data provided (review of previously published studies)                                       |

**Figure S1.** Risk of acute myocardial infarction (AMI) during the first week following daylight saving time (DST) transitions versus control weeks – **Overall**.

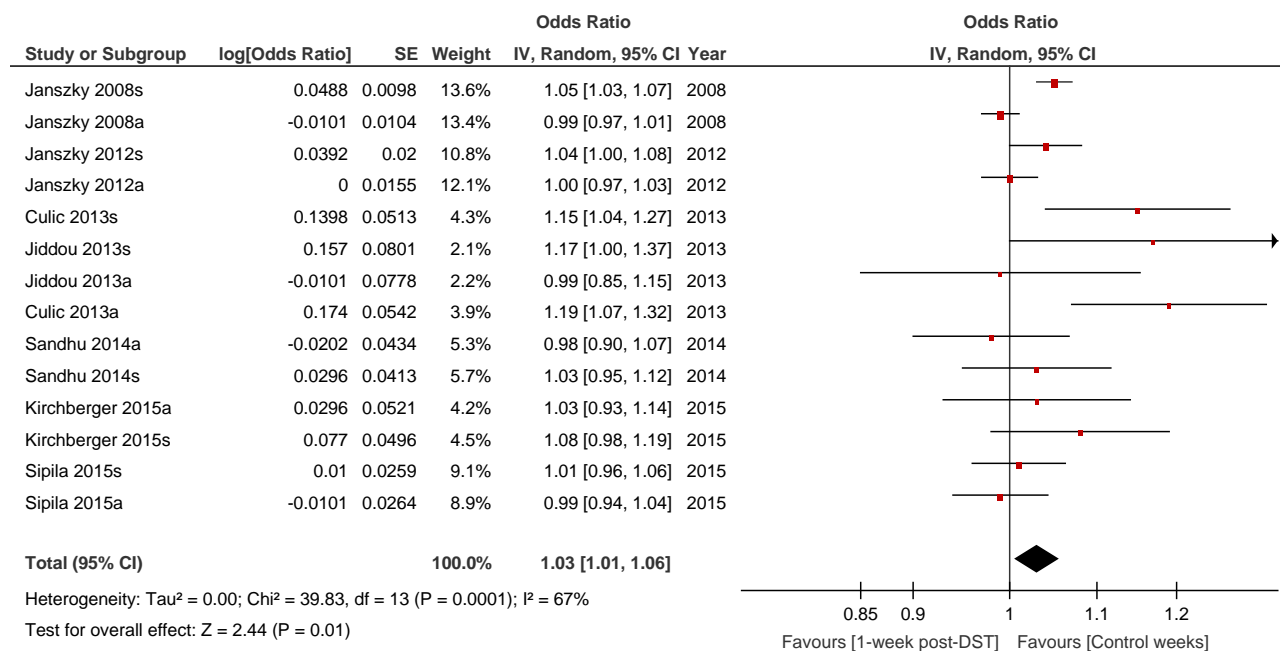

In all studies, "a" = "autumn DST transition", "s" = "spring DST transition".

**Figure S2.** Risk of acute myocardial infarction (AMI) during the first week following daylight saving time (DST) transition versus control weeks – **Females only**.

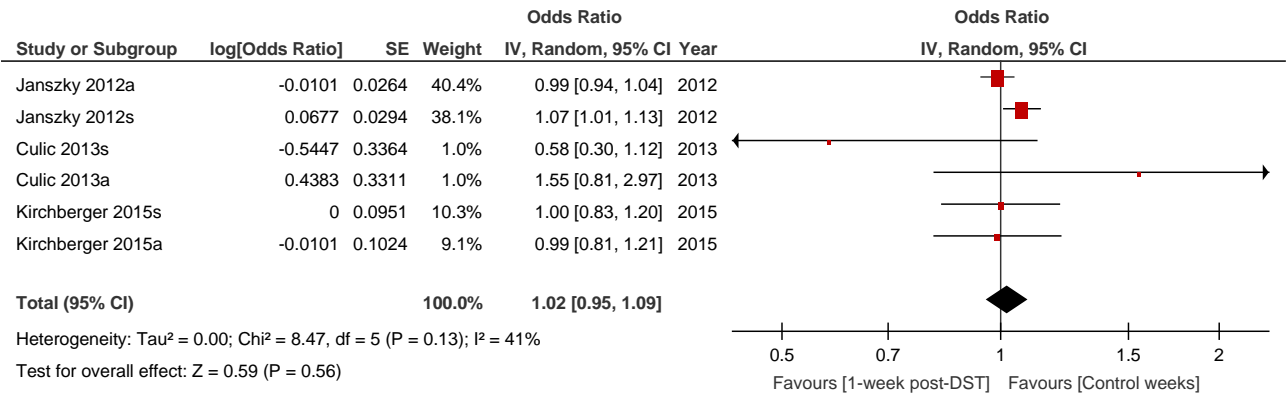

In all studies, "a" = "autumn DST transition", "s" = "spring DST transition".

**Figure S3.** Risk of acute myocardial infarction (AMI) during the first week following daylight saving time (DST) transition versus control weeks – Males only.

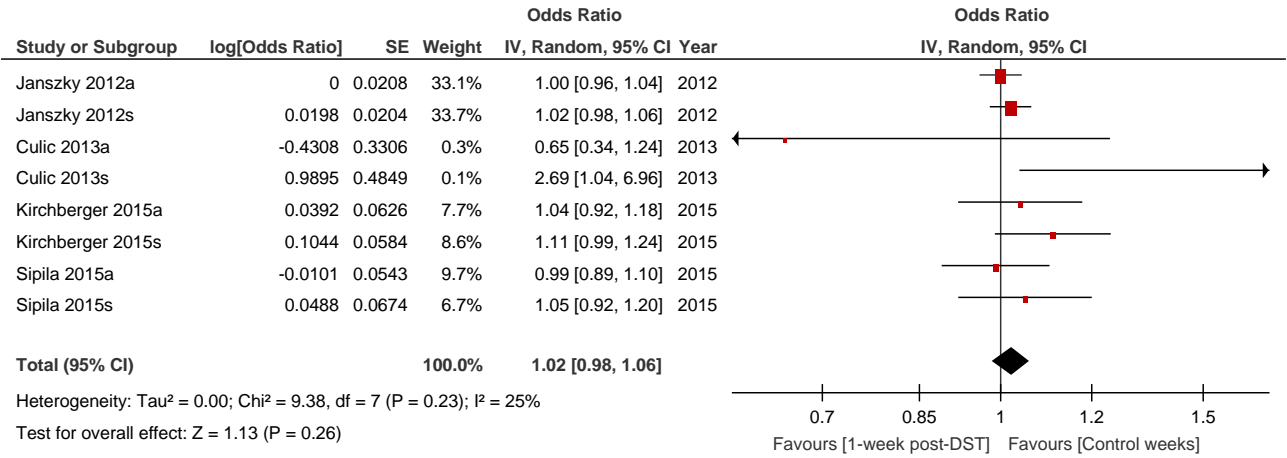

In all studies, "a" = "autumn DST transition", "s" = "spring DST transition".

**Figure S4.** Risk of acute myocardial infarction (AMI) during the first week following daylight saving time (DST) transition versus control weeks – Age <65 years only.

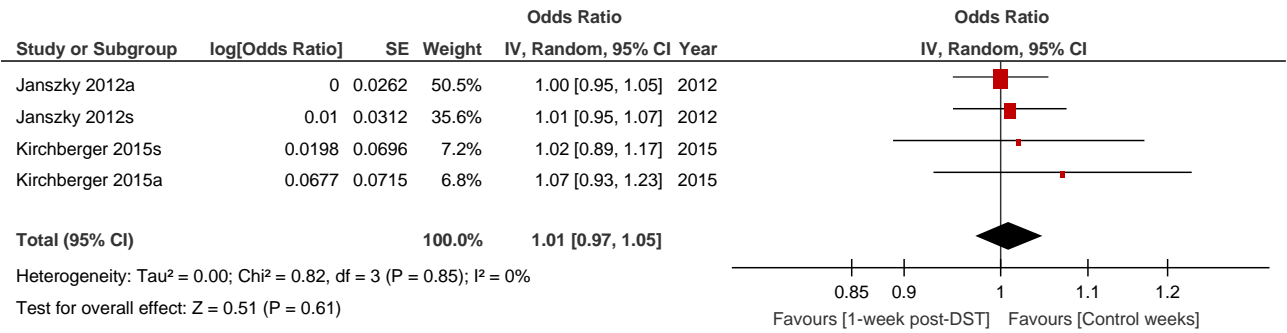

In all studies, "a" = "autumn DST transition", "s" = "spring DST transition".

**Figure S5.** Risk of acute myocardial infarction (AMI) during the first week following daylight saving time (DST) transition versus control weeks – Age ≥65 years only.

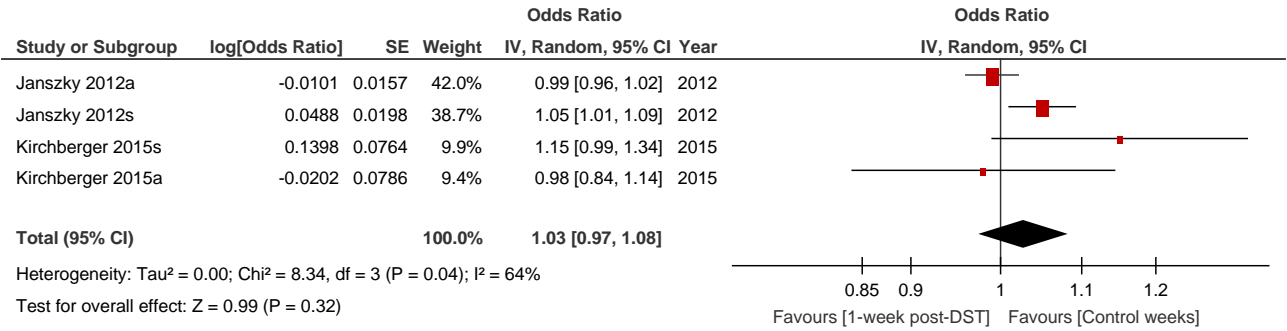

In all studies, "a" = "autumn DST transition", "s" = "spring DST transition".

**Figure S6.** Risk of acute myocardial infarction (AMI) during the first week following daylight saving time (DST) spring transition versus control weeks – **Overall**.

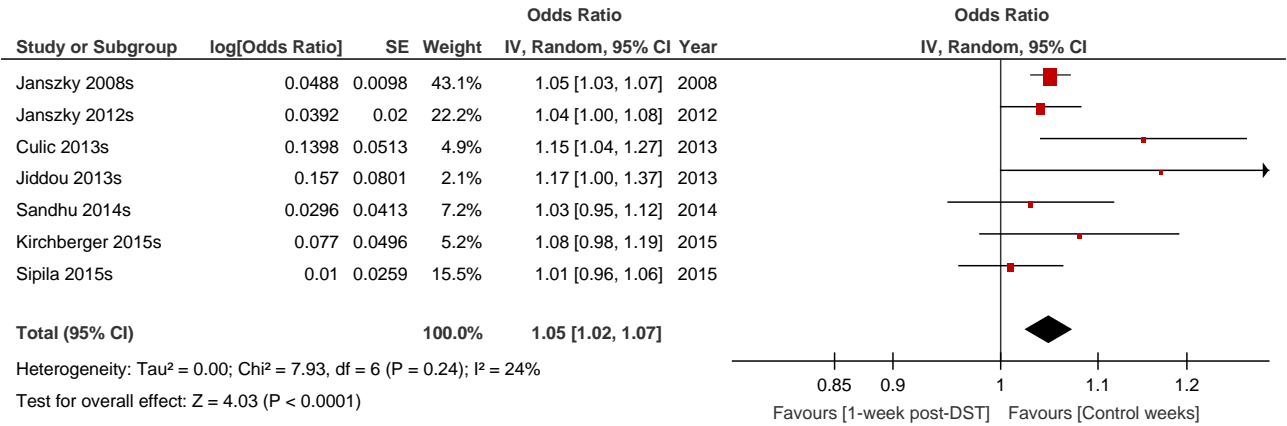

In all studies, "a" = "autumn DST transition", "s" = "spring DST transition".

**Figure S7.** Risk of acute myocardial infarction (AMI) during the first week following daylight saving time (DST) spring transition versus control weeks – **Females only**.

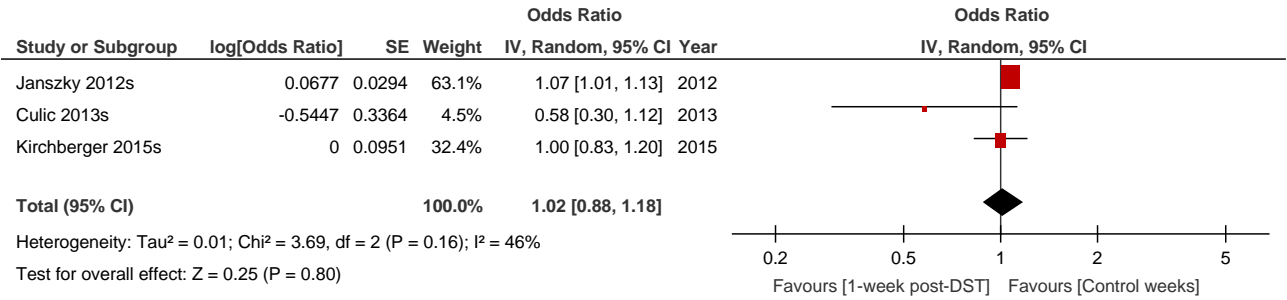

In all studies, "a" = "autumn DST transition", "s" = "spring DST transition".

**Figure S8.** Risk of acute myocardial infarction (AMI) during the first week following daylight saving time (DST) spring transition versus control weeks – **Males only**.

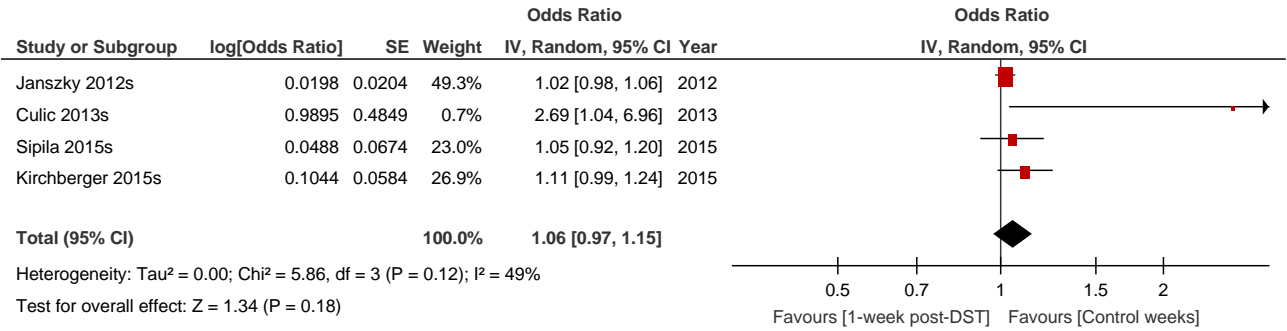

In all studies, "a" = "autumn DST transition", "s" = "spring DST transition".

**Figure S9.** Risk of acute myocardial infarction (AMI) during the first week following daylight saving time (DST) spring transition versus control weeks – Age <65 years only.

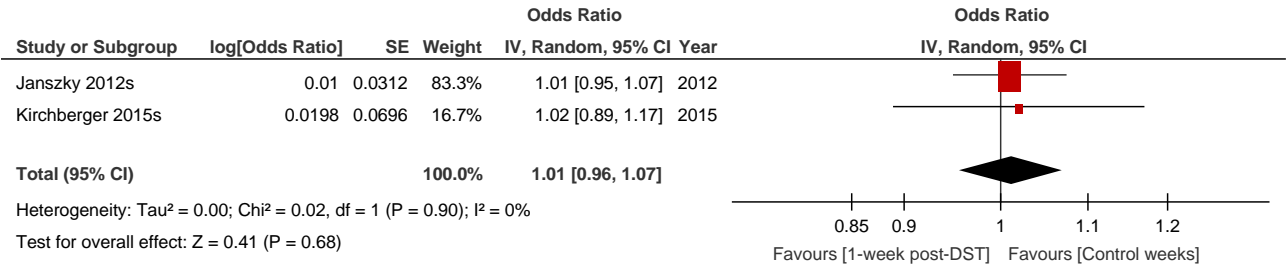

In all studies, "a" = "autumn DST transition", "s" = "spring DST transition".

**Figure S10.** Risk of acute myocardial infarction (AMI) during the first week following daylight saving time (DST) spring transition versus control weeks – Age ≥65 years only.

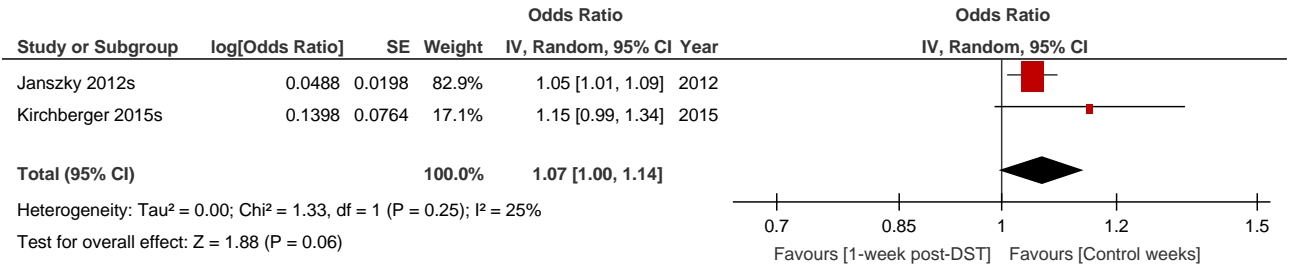

In all studies, "a" = "autumn DST transition", "s" = "spring DST transition".

**Figure S11.** Risk of acute myocardial infarction (AMI) during the first week following daylight saving time (DST) autumn transition versus control weeks – **Overall**.

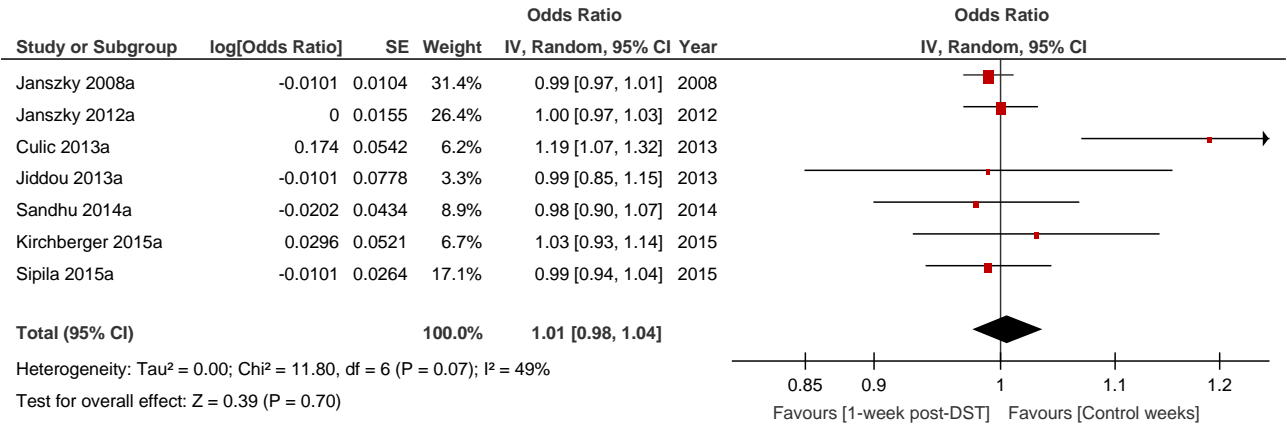

In all studies, "a" = "autumn DST transition", "s" = "spring DST transition".

**Figure S12.** Risk of acute myocardial infarction (AMI) during the first week following daylight saving time (DST) autumn transition versus control weeks – **Females only**.

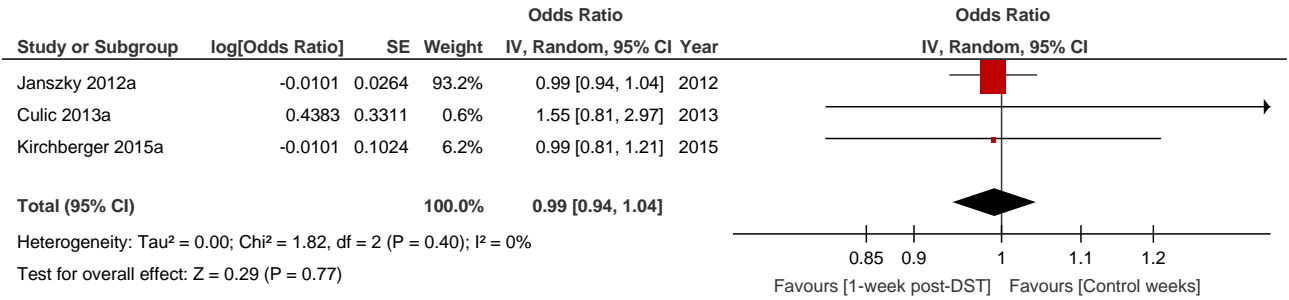

In all studies, "a" = "autumn DST transition", "s" = "spring DST transition".

**Figure S13.** Risk of acute myocardial infarction (AMI) during the first week following daylight saving time (DST) autumn transition versus control weeks – Males only.

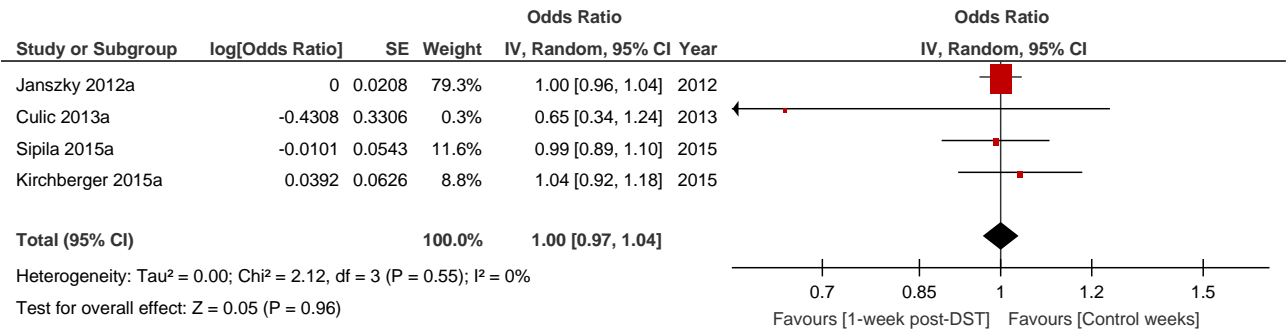

In all studies, "a" = "autumn DST transition", "s" = "spring DST transition".

**Figure S14.** Risk of acute myocardial infarction (AMI) during the first week following daylight saving time (DST) autumn transition versus control weeks – Age <65 years only.

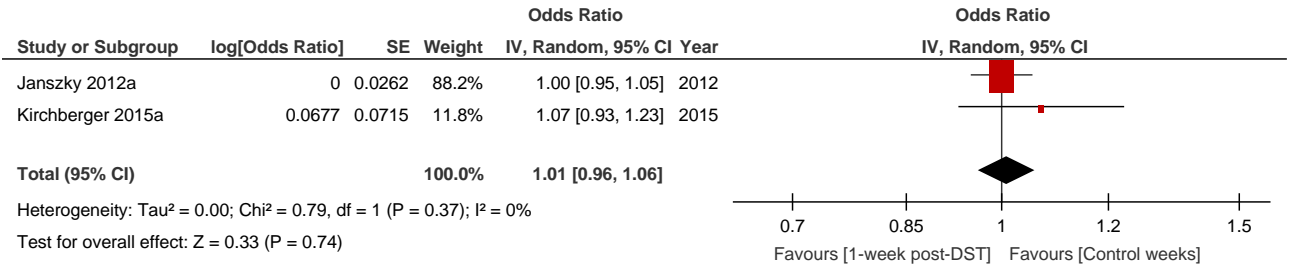

In all studies, "a" = "autumn DST transition", "s" = "spring DST transition".

**Figure S15.** Risk of acute myocardial infarction (AMI) during the first week following daylight saving time (DST) autumn transition versus control weeks – **Age ≥65 years only**.

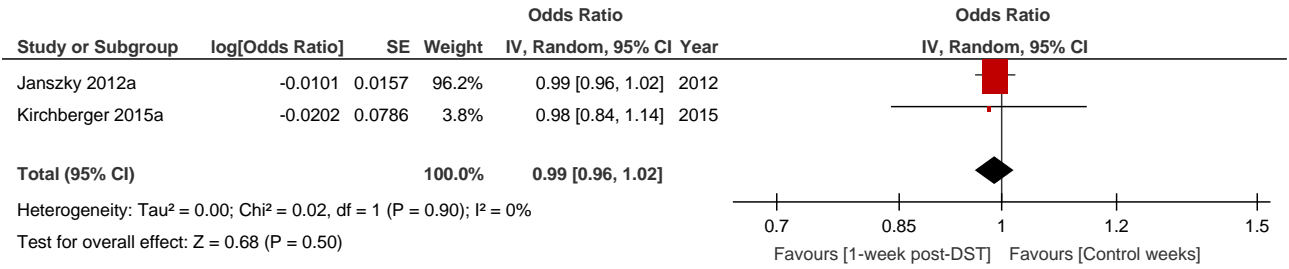

In all studies, "a" = "autumn DST transition", "s" = "spring DST transition".

**Figure S16.** Funnel plot of the logarithm of the odds ratios vs their standard errors (outcome: risk of AMI during the first week following daylight saving time (DST) transitions versus control weeks – **Overall**).

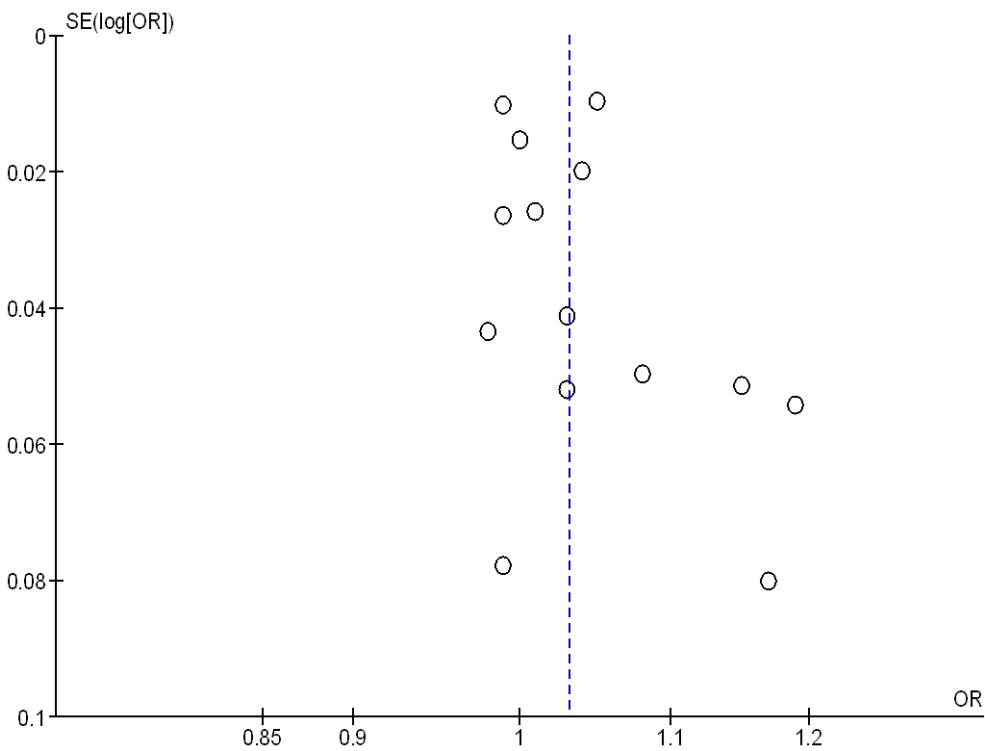

Egger: bias = 0.89 (95% CI = -0.798395 to 2.579988) P = 0.2729

## References

1. Foerch, C.; Korf, H.W.; Steinmetz, H.; Sitzer, M. Abrupt shift of the pattern of diurnal variation in stroke onset with daylight saving time transitions. *Circulation* **2008**, *118*, 284-290.
2. Sipilä, J.O.; Ruuskanen, J.O.; Rautava, P.; Kyto, V. Changes in ischemic stroke occurrence following daylight saving time transitions. *Sleep Med* **2016**, *27-28*, 20-24.
3. Lindenberger, L.M.; Ackermann, H.; Parzeller, M. The controversial debate about daylight saving time (DST)-results of a retrospective forensic autopsy study in Frankfurt/Main (Germany) over 10 years (2006-2015). *Int J Legal Med* **2018**, [E-pub ahead of print].
4. Manfredini, R.; Fabbian, F.; Cappadona, R.; Modesti, P.A. Daylight saving time, circadian rhythms, and cardiovascular health. *Intern Emerg Med* **2018**, *13*, 641-646.
